# Supplementary material
Source: PubMed Central journal article supplement (PMC6339592)
Supplement: NIHMS1515737-supplement-401_2018_1942_MOESM1_ESM.pdf [file NIHMS1515737-supplement-401_2018_1942_MOESM1_ESM.pdf]

**Suppl. Table 1**

**Sampling parameters for neuronal density estimates**

| Subjects | Left                                     |                  |                        |                                |                   | Right                                    |                  |                        |                                |                   |
|----------|------------------------------------------|------------------|------------------------|--------------------------------|-------------------|------------------------------------------|------------------|------------------------|--------------------------------|-------------------|
|          | VENs/Fork cells<br>No. Sampling<br>Sites | VENs<br>CE (SH1) | Fork cells<br>CE (SH1) | L5NNs<br>No. Sampling<br>Sites | L5NNs<br>CE (SH1) | VENs/Fork cells<br>No. Sampling<br>Sites | VENs<br>CE (SH1) | Fork cells<br>CE (SH1) | L5NNs<br>No. Sampling<br>Sites | L5NNs<br>CE (SH1) |
| N1       | 747                                      | 0.075            | 0.084                  | 45                             | 0.072             | 791                                      | 0.064            | 0.086                  | 54                             | 0.083             |
| N2       | 686                                      | 0.059            | 0.082                  | 50                             | 0.099             | 756                                      | 0.066            | 0.088                  | 49                             | 0.083             |
| N3       | 726                                      | 0.067            | 0.101                  | 35                             | 0.069             | 763                                      | 0.059            | 0.115                  | 56                             | 0.085             |
| N4       | 695                                      | 0.056            | 0.055                  | 69                             | 0.079             | 700                                      | 0.059            | 0.062                  | 70                             | 0.065             |
| N5       | 709                                      | 0.054            | 0.055                  | 68                             | 0.067             | 700                                      | 0.051            | 0.067                  | 69                             | 0.063             |
| N6       | 699                                      | 0.048            | 0.049                  | 69                             | 0.073             | 717                                      | 0.046            | 0.063                  | 62                             | 0.071             |
| N7       | 697                                      | 0.090            | 0.083                  | 71                             | 0.067             | 698                                      | 0.064            | 0.060                  | 70                             | 0.063             |
| N8       | 693                                      | 0.055            | 0.057                  | 70                             | 0.088             | 714                                      | 0.064            | 0.064                  | 77                             | 0.070             |
| N9       | 697                                      | 0.055            | 0.085                  | 68                             | 0.074             | 658                                      | 0.062            | 0.063                  | 65                             | 0.066             |
| N10      | 663                                      | 0.061            | 0.074                  | 65                             | 0.075             | 692                                      | 0.056            | 0.057                  | 68                             | 0.062             |
| S1       | 695                                      | 0.092            | 0.085                  | 68                             | 0.067             | 675                                      | 0.113            | 0.094                  | 65                             | 0.072             |
| S2       | 645                                      | 0.066            | 0.064                  | 64                             | 0.092             | 700                                      | 0.059            | 0.059                  | 71                             | 0.061             |
| S3       | 677                                      | 0.058            | 0.065                  | 68                             | 0.063             | 657                                      | 0.065            | 0.069                  | 76                             | 0.062             |
| S4       | 704                                      | 0.092            | 0.089                  | 70                             | 0.078             | 708                                      | 0.091            | 0.096                  | 69                             | 0.071             |
| S5       | 679                                      | 0.079            | 0.152                  | 45                             | 0.080             | 702                                      | 0.096            | 0.225                  | 32                             | 0.102             |
| S6       | 741                                      | 0.098            | 0.116                  | 48                             | 0.075             | 727                                      | 0.086            | 0.128                  | 47                             | 0.069             |
| S7       | 685                                      | 0.064            | 0.103                  | 78                             | 0.068             | na                                       | na               | na                     | na                             | na                |
| S8       | 688                                      | 0.074            | 0.068                  | 76                             | 0.077             | 720                                      | 0.071            | 0.074                  | 87                             | 0.058             |
| S9       | na                                       | na               | na                     | na                             | na                | 697                                      | 0.049            | 0.049                  | 69                             | 0.066             |
| S10      | 712                                      | 0.069            | 0.063                  | 70                             | 0.073             | 672                                      | 0.062            | 0.048                  | 66                             | 0.073             |
| S11      | na                                       | na               | na                     | na                             | Na                | 696                                      | 0.085            | 0.062                  | 69                             | 0.070             |
| S12      | 662                                      | 0.093            | 0.171                  | 55                             | 0.087             | 789                                      | 0.102            | 0.205                  | 58                             | 0.080             |
| S13      | 855                                      | 0.076            | 0.109                  | 63                             | 0.067             | 699                                      | 0.065            | 0.106                  | 49                             | 0.063             |
| S14      | na                                       | na               | na                     | na                             | na                | 701                                      | 0.080            | 0.091                  | 70                             | 0.080             |
| S15      | na                                       | na               | na                     | na                             | na                | 725                                      | 0.066            | 0.068                  | 49                             | 0.083             |
| S16      | na                                       | na               | na                     | na                             | na                | 757                                      | 0.047            | 0.052                  | 75                             | 0.081             |
| S17      | na                                       | na               | na                     | na                             | na                | 677                                      | 0.059            | 0.074                  | 64                             | 0.056             |
| C1       | 788                                      | 0.100            | 0.090                  | 81                             | 0.060             | 707                                      | 0.099            | 0.116                  | 71                             | 0.062             |
| C2       | na                                       | na               | na                     | na                             | na                | 664                                      | 0.106            | 0.123                  | 66                             | 0.073             |
| C3       | 744                                      | 0.072            | 0.075                  | 65                             | 0.066             | na                                       | na               | na                     | na                             | na                |
| C4       | 689                                      | 0.079            | 0.124                  | 69                             | 0.067             | 706                                      | 0.090            | 0.098                  | 71                             | 0.069             |
| C5       | na                                       | na               | na                     | na                             | na                | na                                       | na               | na                     | na                             | na                |
| C6       | na                                       | na               | na                     | na                             | na                | 702                                      | 0.068            | 0.104                  | 71                             | 0.058             |
| C7       | na                                       | na               | na                     | na                             | na                | 713                                      | 0.059            | 0.064                  | 73                             | 0.082             |
| C8       | na                                       | na               | na                     | na                             | na                | 695                                      | 0.066            | 0.065                  | 68                             | 0.075             |
| C9       | na                                       | na               | na                     | na                             | na                | 689                                      | 0.117            | 0.101                  | 66                             | 0.054             |
| C10      | 698                                      | 0.086            | 0.088                  | 76                             | 0.076             | 708                                      | 0.043            | 0.046                  | 70                             | 0.066             |

**Key:** CE: coefficient of error; SH1: Schmitz-Hof equation, 1<sup>st</sup> estimated; L5NNs: Neighboring layer 5 neighboring neurons; na: not assessed

Suppl. Table 2

## Sampling parameters for TDP-43 inclusion fraction estimates

| Subjects | Left                               |               |                     |                          |                |                                 |                       | Right                              |               |                     |                          |                |                                 |                       |
|----------|------------------------------------|---------------|---------------------|--------------------------|----------------|---------------------------------|-----------------------|------------------------------------|---------------|---------------------|--------------------------|----------------|---------------------------------|-----------------------|
|          | VENs/Fork cells No. Sampling Sites | VENs CE (SH1) | Fork cells CE (SH1) | L5NNs No. Sampling Sites | L5NNs CE (SH1) | L2-3 Neurons No. Sampling Sites | L2-3 Neurons CE (SH1) | VENs/Fork cells No. Sampling Sites | VENs CE (SH1) | Fork cells CE (SH1) | L5NNs No. Sampling Sites | L5NNs CE (SH1) | L2-3 Neurons No. Sampling Sites | L2-3 Neurons CE (SH1) |
| S1       | 697                                | 0.083         | 0.107               | 70                       | 0.078          | 73                              | 0.063                 | 696                                | 0.091         | 0.121               | 57                       | 0.074          | 79                              | 0.063                 |
| S2       | 660                                | 0.067         | 0.080               | 68                       | 0.083          | 91                              | 0.055                 | 717                                | 0.060         | 0.071               | 70                       | 0.078          | 72                              | 0.058                 |
| S3       | 725                                | 0.058         | 0.074               | 78                       | 0.058          | 66                              | 0.058                 | 706                                | 0.076         | 0.090               | 69                       | 0.074          | 88                              | 0.053                 |
| S4       | 702                                | 0.090         | 0.097               | 67                       | 0.078          | 74                              | 0.053                 | 636                                | 0.088         | 0.110               | 59                       | 0.086          | 73                              | 0.049                 |
| S5       | 707                                | 0.092         | 0.196               | 46                       | 0.095          | 76                              | 0.076                 | 956                                | 0.082         | 0.202               | 50                       | 0.099          | 66                              | 0.071                 |
| S6       | 884                                | 0.070         | 0.113               | 45                       | 0.092          | 68                              | 0.067                 | 877                                | 0.084         | 0.115               | 54                       | 0.064          | 78                              | 0.063                 |
| S7       | 691                                | 0.073         | 0.091               | 65                       | 0.073          | 60                              | 0.065                 | na                                 | na            | na                  | na                       | na             | na                              | na                    |
| S8       | 622                                | 0.087         | 0.090               | 68                       | 0.073          | 64                              | 0.082                 | 648                                | 0.093         | 0.101               | 71                       | 0.082          | 71                              | 0.065                 |
| S9       | na                                 | na            | na                  | na                       | na             | na                              | na                    | 886                                | 0.046         | 0.070               | 62                       | 0.064          | 68                              | 0.056                 |
| S10      | 700                                | 0.083         | 0.106               | 63                       | 0.084          | 87                              | 0.065                 | 702                                | 0.079         | 0.106               | 71                       | 0.083          | n/a                             | n/a                   |
| S11      | na                                 | na            | na                  | na                       | na             | na                              | na                    | 746                                | 0.100         | 0.118               | 71                       | 0.075          | 90                              | 0.079                 |
| S12      | 1128                               | 0.061         | 0.110               | 47                       | 0.073          | 78                              | 0.073                 | 812                                | 0.080         | 0.134               | 43                       | 0.105          | 70                              | 0.091                 |
| S13      | 735                                | 0.079         | 0.146               | 49                       | 0.077          | 62                              | 0.097                 | 699                                | 0.071         | 0.097               | 48                       | 0.097          | 48                              | 0.077                 |
| S14      | na                                 | na            | na                  | na                       | na             | na                              | na                    | 719                                | 0.064         | 0.083               | 74                       | 0.067          | 69                              | 0.071                 |
| S15      | na                                 | na            | na                  | na                       | na             | na                              | na                    | 709                                | 0.074         | 0.088               | 41                       | 0.096          | 74                              | 0.061                 |
| S16      | na                                 | na            | na                  | na                       | na             | na                              | na                    | 623                                | 0.061         | 0.082               | 61                       | 0.054          | 73                              | 0.064                 |
| S17      | na                                 | na            | na                  | na                       | na             | na                              | na                    | 661                                | 0.087         | 0.095               | 69                       | 0.065          | 77                              | 0.068                 |
| C1       | 710                                | 0.098         | 0.121               | 75                       | 0.066          | na                              | na                    | 698                                | 0.081         | 0.123               | 70                       | 0.060          | na                              | na                    |
| C2       | na                                 | na            | na                  | na                       | na             | na                              | na                    | 682                                | 0.085         | 0.111               | 69                       | 0.075          | na                              | na                    |
| C3       | 682                                | 0.066         | 0.087               | 70                       | 0.067          | na                              | na                    | na                                 | na            | na                  | na                       | na             | na                              | na                    |
| C4       | 661                                | 0.077         | 0.150               | 40                       | 0.100          | na                              | na                    | 973                                | 0.063         | 0.141               | 47                       | 0.110          | na                              | na                    |
| C5       | na                                 | na            | na                  | na                       | na             | na                              | na                    | na                                 | na            | na                  | na                       | na             | na                              | na                    |
| C6       | na                                 | na            | na                  | na                       | na             | na                              | na                    | 690                                | 0.057         | 0.077               | 69                       | 0.056          | na                              | na                    |
| C7       | na                                 | na            | na                  | na                       | na             | na                              | na                    | 538                                | 0.065         | 0.083               | 53                       | 0.097          | na                              | na                    |
| C8       | na                                 | na            | na                  | na                       | na             | na                              | na                    | 769                                | 0.064         | 0.088               | 71                       | 0.066          | na                              | na                    |
| C9       | na                                 | na            | na                  | na                       | na             | na                              | na                    | 685                                | 0.090         | 0.110               | 69                       | 0.073          | na                              | na                    |
| C10      | 682                                | 0.069         | 0.067               | 86                       | 0.071          | na                              | na                    | na                                 | na            | na                  | na                       | na             | na                              | na                    |

**Key:** CE: coefficient of error; SH1: Schmitz-Hof equation, 1<sup>st</sup> estimated; L5NNs: Neighboring layer 5 neighboring neurons; L2-3 Neurons: Layer 2-3 neurons; na: not assessed

**Suppl. Table 3**

**Subject demographics, morphometry.**

|                                        | <b>Controls</b> | <b>Sporadic bvFTD/MND</b>                                | <b>C9orf72-bvFTD/MND</b>                           |
|----------------------------------------|-----------------|----------------------------------------------------------|----------------------------------------------------|
| <b>N</b>                               | 4               | 7                                                        | 7                                                  |
| <b>Clinical diagnoses</b>              | N.A.            | 4 bvFTD-MND, 3 bvFTD                                     | 1 ALS, 5 bvFTD-MND, 1 bvFTD                        |
| <b>Neuropathological diagnoses</b>     | N.A.            | 4 FTLD-TDP-B, MND; 2<br>FTLD-TDP-B, ALS; 1<br>FTLD-TDP-B | 2 ALS-TDP; 4 FTLD-TDP-B,<br>MND; 1 FTLD-TDP-U, MND |
| <b>Gender (M:F)</b>                    | 2:2             | 5:2                                                      | 5:2                                                |
| <b>Age at death (years), mean (SD)</b> | 59.8 (3.8)      | 61.3 (5.7)                                               | 60.1 (3.5)                                         |

**Suppl. Table 4**

**Distribution of VENs across clusters by TDP-43 status**

|                             | <b>Cluster</b> |          |          |
|-----------------------------|----------------|----------|----------|
|                             | <b>1</b>       | <b>2</b> | <b>3</b> |
| Normal TDP, control VENs    | 9              | 22       | 8        |
| Normal TDP, patient VENs    | 61             | 57       | 11       |
| TDP-43 inclusion VENs       | 4              | 35       | 43       |
| TDP-43-depleted VENs        | 0              | 30       | 63       |
| <b>Chi-square statistic</b> | 135.48         |          |          |
| <b>p</b>                    | < 0.0001       |          |          |

Suppl. Table 5

## Association between atrophy severity rank and neuronal compartment

| VENs, TDP-43 inclusions       | Rank     |    |    |    | VENs, nuclear TDP-43 depleted       | Rank     |    |    |    |
|-------------------------------|----------|----|----|----|-------------------------------------|----------|----|----|----|
|                               | 1        | 2  | 3  | 4  |                                     | 1        | 2  | 3  | 4  |
| Apical dendrite               | 53       | 31 | 14 | 7  | Apical dendrite                     | 61       | 27 | 9  | 8  |
| Basal dendrite                | 30       | 51 | 16 | 8  | Basal dendrite                      | 20       | 55 | 23 | 7  |
| Nucleus                       | 13       | 10 | 30 | 52 | Nucleus                             | 21       | 19 | 27 | 38 |
| Soma                          | 9        | 13 | 45 | 38 | Soma                                | 3        | 4  | 46 | 52 |
| Chi-square statistic          | 167.73   |    |    |    | Chi-square statistic                | 231.69   |    |    |    |
| p                             | < 0.0001 |    |    |    | p                                   | < 0.0001 |    |    |    |
| Fork cells, TDP-43 inclusions | Rank     |    |    |    | Fork cells, nuclear TDP-43 depleted | Rank     |    |    |    |
|                               | 1        | 2  | 3  | 4  |                                     | 1        | 2  | 3  | 4  |
| Apical dendrite               | 51       | 39 | 9  | 2  | Apical dendrite                     | 38       | 18 | 5  | 1  |
| Basal dendrite                | 39       | 38 | 13 | 11 | Basal dendrite                      | 21       | 31 | 8  | 2  |
| Nucleus                       | 9        | 16 | 45 | 31 | Nucleus                             | 3        | 12 | 31 | 16 |
| Soma                          | 2        | 8  | 34 | 57 | Soma                                | 0        | 1  | 18 | 43 |
| Chi-square statistic          | 200.28   |    |    |    | Chi-square statistic                | 191.23   |    |    |    |
| p                             | < 0.0001 |    |    |    | p                                   | < 0.0001 |    |    |    |
| Pyramidals, TDP-43 inclusions | Rank     |    |    |    | Pyramidals, nuclear TDP-43 depleted | Rank     |    |    |    |
|                               | 1        | 2  | 3  | 4  |                                     | 1        | 2  | 3  | 4  |
| Apical dendrite               | 43       | 35 | 20 | 12 | Apical dendrite                     | 25       | 19 | 5  | 38 |
| Basal dendrite                | 21       | 28 | 37 | 24 | Basal dendrite                      | 24       | 24 | 18 | 21 |
| Nucleus                       | 14       | 23 | 31 | 42 | Nucleus                             | 23       | 23 | 26 | 15 |
| Soma                          | 32       | 24 | 22 | 32 | Soma                                | 15       | 21 | 38 | 13 |
| Chi-square statistic          | 45.31    |    |    |    | Chi-square statistic                | 47.86    |    |    |    |
| p                             | < 0.0001 |    |    |    | p                                   | < 0.0001 |    |    |    |

Suppl. Table 6

## Association between atrophy severity rank and neuronal compartment – pairwise comparisons

| <b>VENs, TDP-43 inclusions</b>                     |                       |                        |
|----------------------------------------------------|-----------------------|------------------------|
| Comparison                                         | Chi-squared statistic | p (FDR corrected)      |
| apical dendrite: basal dendrite                    | 11.45                 | 0.0114                 |
| apical dendrite: nucleus                           | 75.14                 | $1.01 \times 10^{-15}$ |
| apical dendrite: soma                              | 76.23                 | $1.01 \times 10^{-15}$ |
| basal dendrite: nucleus                            | 70.81                 | $5.74 \times 10^{-15}$ |
| basal dendrite: soma                               | 67.22                 | $2.52 \times 10^{-14}$ |
| nucleus: soma                                      | 6.30                  | 0.098                  |
| <b>VENs, nuclear TDP-43-depletion</b>              |                       |                        |
| Comparison                                         | Chi-squared statistic | p (FDR corrected)      |
| apical dendrite: basal dendrite                    | 36.51                 | $7.02 \times 10^{-08}$ |
| apical dendrite: nucleus                           | 84.88                 | $3.62 \times 10^{-15}$ |
| apical dendrite: soma                              | 126.78                | $1.60 \times 10^{-26}$ |
| basal dendrite: nucleus                            | 72.72                 | $2.22 \times 10^{-15}$ |
| basal dendrite: soma                               | 98.64                 | $9.15 \times 10^{-21}$ |
| nucleus: soma                                      | 20.92                 | 0.000109               |
| <b>Fork cells, TDP-43 inclusions</b>               |                       |                        |
| Comparison                                         | Chi-squared statistic | p (FDR corrected)      |
| apical dendrite: basal dendrite                    | 8.57                  | 0.0356                 |
| apical dendrite: nucleus                           | 88.50                 | $9.18 \times 10^{-19}$ |
| apical dendrite: soma                              | 131.55                | $1.50 \times 10^{-27}$ |
| basal dendrite: nucleus                            | 54.89                 | $1.09 \times 10^{-11}$ |
| basal dendrite: soma                               | 93.46                 | $1.19 \times 10^{-19}$ |
| nucleus: soma                                      | 16.34                 | 0.00116                |
| <b>Fork cells, nuclear TDP-43-depletion</b>        |                       |                        |
| Comparison                                         | Chi-squared statistic | p (FDR corrected)      |
| apical dendrite: basal dendrite                    | 9.37                  | 0.0247                 |
| apical dendrite: nucleus                           | 63.09                 | $2.56 \times 10^{-13}$ |
| apical dendrite: soma                              | 100.65                | $6.78 \times 10^{-21}$ |
| basal dendrite: nucleus                            | 46.35                 | $7.17 \times 10^{-10}$ |
| basal dendrite: soma                               | 90.33                 | $5.58 \times 10^{-19}$ |
| nucleus: soma                                      | 28.11                 | $4.13 \times 10^{-6}$  |
| <b>Pyramidal neurons, TDP-43 inclusions</b>        |                       |                        |
| Comparison                                         | Chi-squared statistic | p (FDR corrected)      |
| apical dendrite: basal dendrite                    | 17.41                 | 0.00175                |
| apical dendrite: nucleus                           | 36.28                 | $3.93 \times 10^{-7}$  |
| apical dendrite: soma                              | 12.85                 | 0.00994                |
| basal dendrite: nucleus                            | 7.33                  | 0.0621                 |
| basal dendrite: soma                               | 7.55                  | 0.0621                 |
| nucleus: soma                                      | 9.94                  | 0.0285                 |
| <b>Pyramidal neurons, nuclear TDP-43-depletion</b> |                       |                        |
| Comparison                                         | Chi-squared statistic | p (FDR corrected)      |
| apical dendrite: basal dendrite                    | 1.82                  | 0.611                  |
| apical dendrite: nucleus                           | 24.36                 | $6.33 \times 10^{-5}$  |
| apical dendrite: soma                              | 4.71                  | 0.233                  |
| basal dendrite: nucleus                            | 14.11                 | 0.00552                |
| basal dendrite: soma                               | 10.10                 | 0.0266                 |
| nucleus: soma                                      | 40.76                 | $4.40 \times 10^{-8}$  |

Suppl. Figure 1

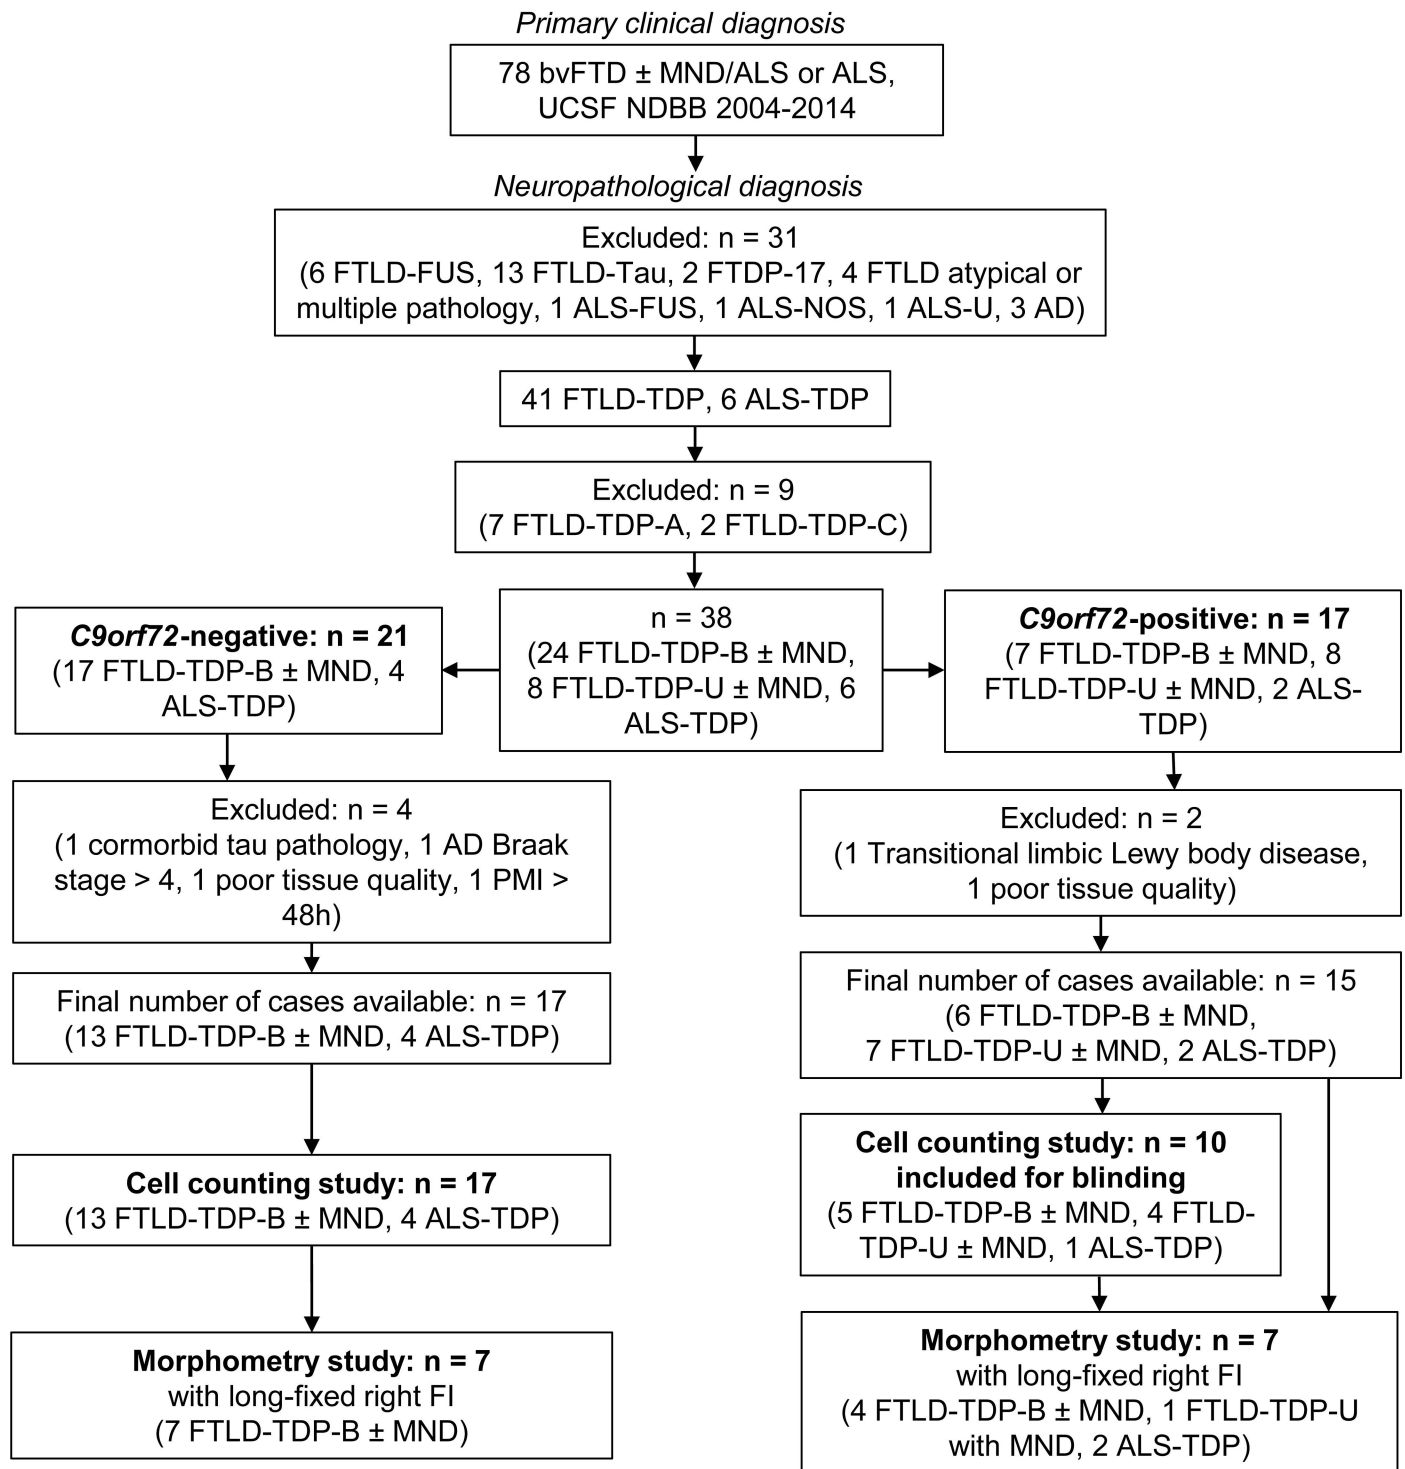

**Suppl. Figure 1**  
**Subject selection process**

Flowchart showing patients selected for sporadic and C9orf72-bvFTD/MND groups.

Suppl. Figure 2

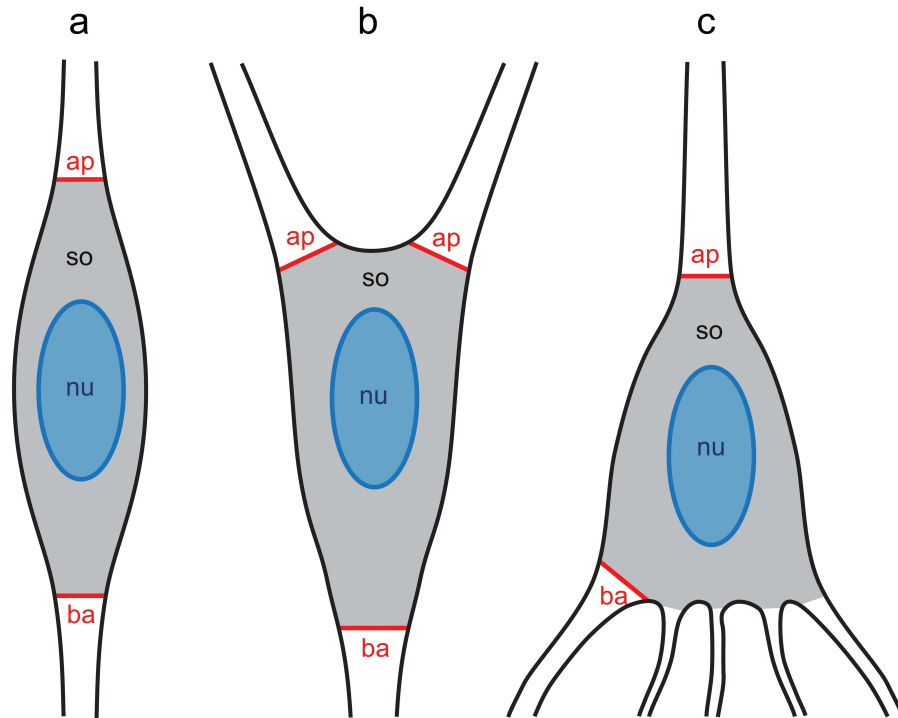

**Suppl. Figure 2**

**Morphometric measurements in VENS fork cells, and neighboring Layer 5 pyramidal cells.**

(a-c) Apical (ap) and basal (ba) dendritic diameter and nuclear (nu) and somatic (so) cross sectional area were measured for VENS (a), fork cells (b), and neighboring Layer 5 pyramidal cells (c). In fork cells, the diameter was measured for both apical dendrites. In pyramidal neurons the diameter of the largest basal dendrite was measured.

Suppl. Figure 3

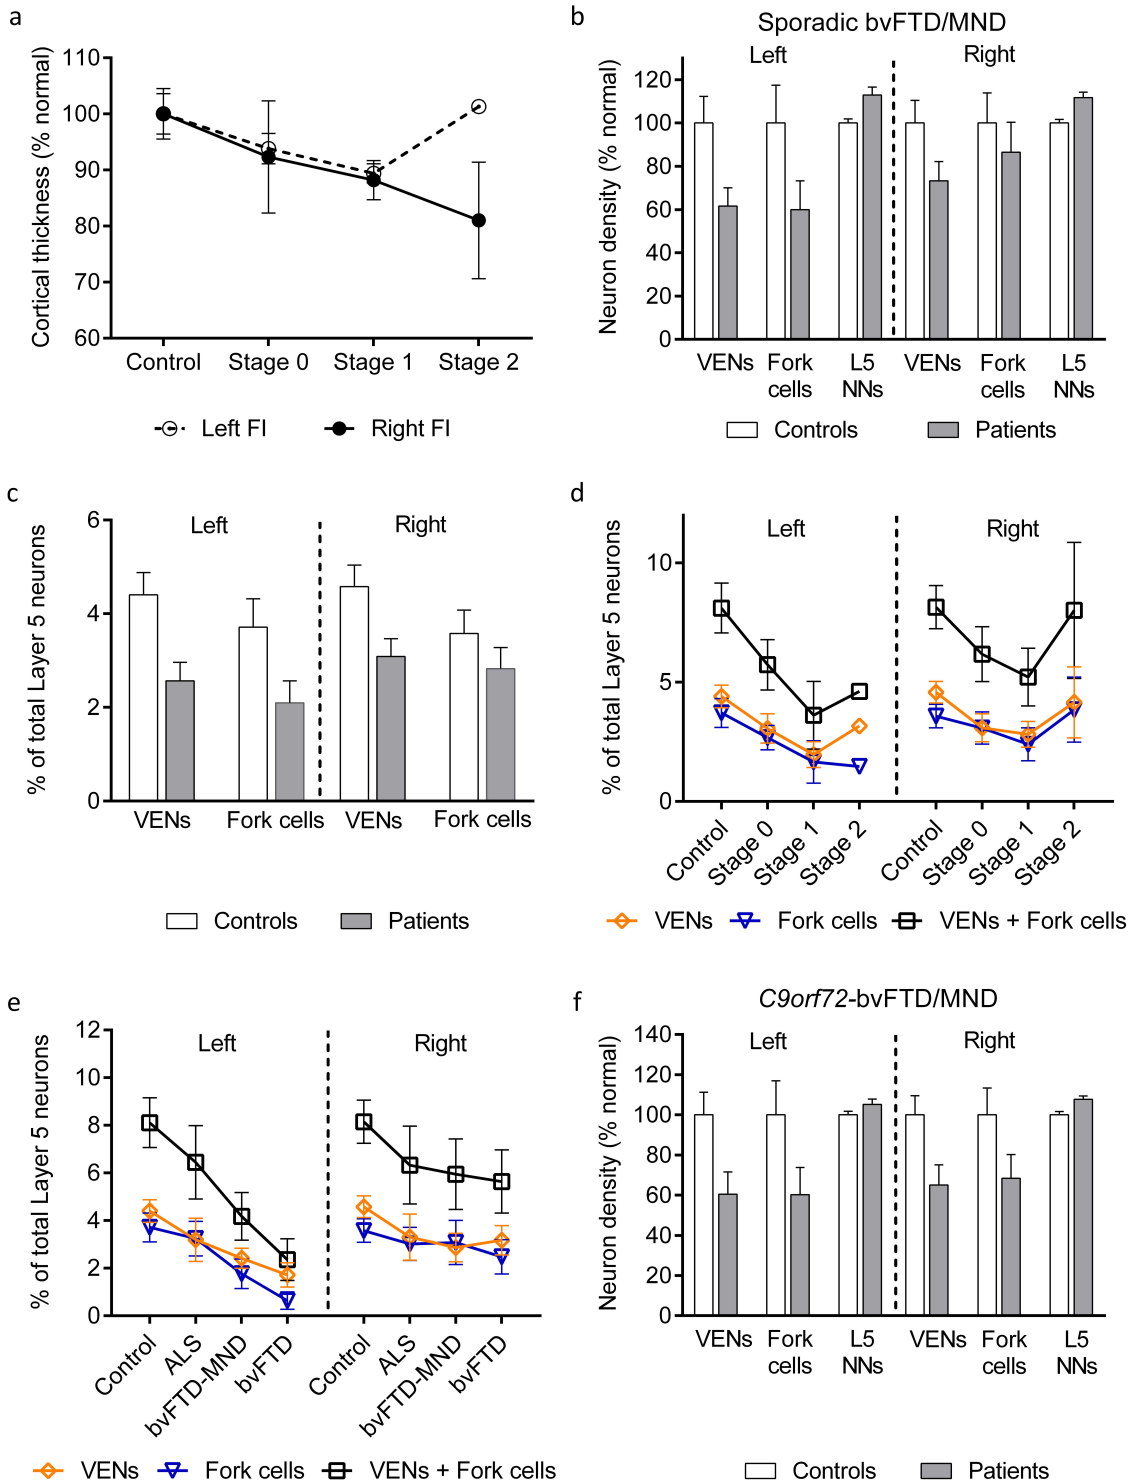

**Suppl. Figure 3**  
**Mild FI VEN and fork cell loss in early stage cases.**

(a) Cortical thickness decreased with increasing Broe stage and was therefore included in the models as a fixed effect. (b-c) VENs and fork cells showed a non-significant trend toward decreased density (b) and percentage of total neurons (c) in both left and right FI. (d) FI VENs and fork cells were lost in both left and right FI in subjects with mild gross atrophy (Broe stage 0-1) but VEN and fork cell loss was less evident in subjects with more severe global degeneration. (e) There was no clear association between clinical diagnosis and VEN or fork cell loss in the right FI, but more VEN and fork cell loss in subjects with bvFTD±MND than ALS alone in the left FI. (f) A trend toward mild VEN and fork cell loss was seen in *C9orf72*-bvFTD/MND. Predicted values from linear mixed effect models are shown for a-f. Data for each group is presented as percent of the normal mean ± SEM in a, b and f, and mean ± SEM in c-e. The error bar for Broe stage 2 in d represents the range. L5 NNs: Neighboring Layer 5 neurons.



Suppl. Figure 4

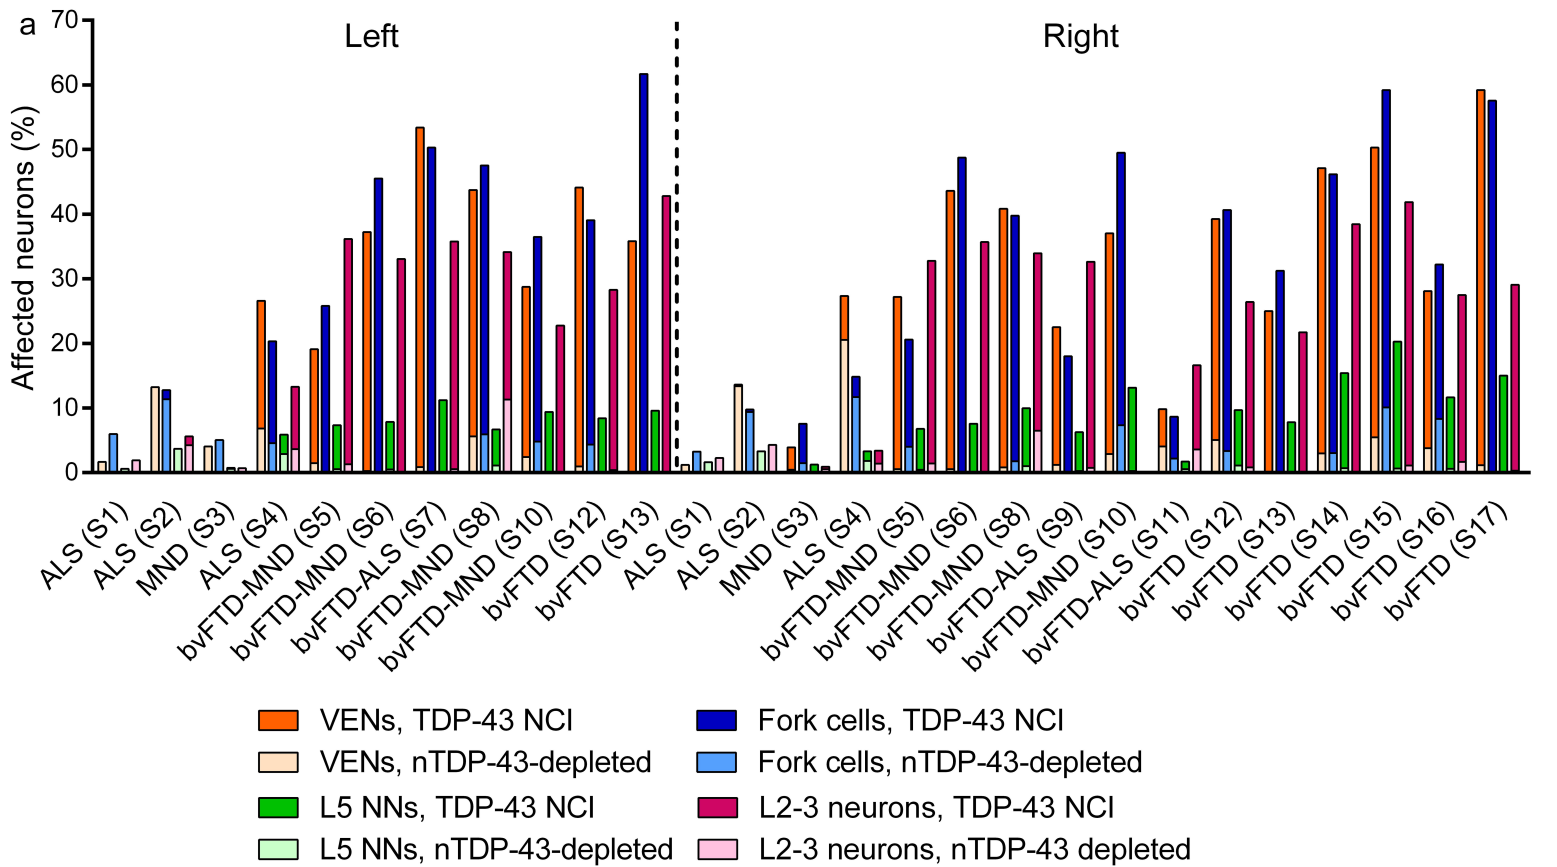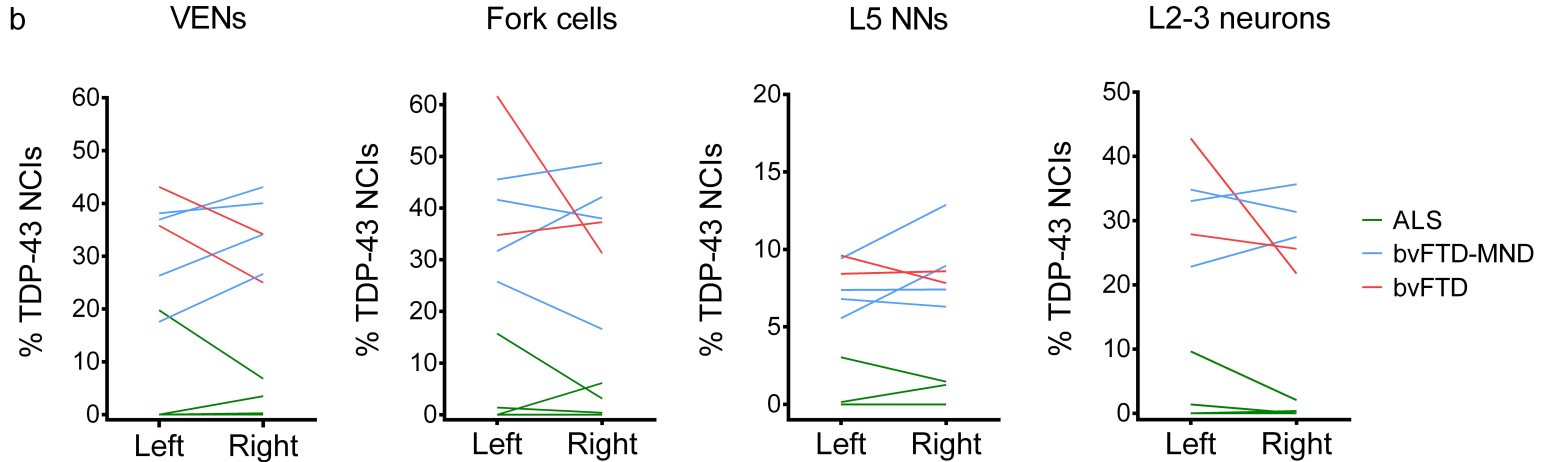

**Suppl. Figure 4**

**Percentage of affected VENs, fork cells, and neighboring Layer 5 neurons in each patient with sporadic bvFTD/MND.**

(a) Although TDP-43 aggregation was more prominent than nuclear TDP-43 depletion in patients with sporadic bvFTD/MND, patients with ALS showed a higher proportion of nuclear TDP-43-depleted VENs, fork cells, and neighboring Layer 5 neurons (L5 NNs) and Layer 2-3 (L2-3) neurons. (b) No consistent pattern of right-left asymmetry in TDP-43 neuronal cytoplasmic inclusion (NCI) fraction was evident in patients with sporadic bvFTD/MND with bilateral FI available. Each line in b represents a single subject.

Suppl. Figure 5

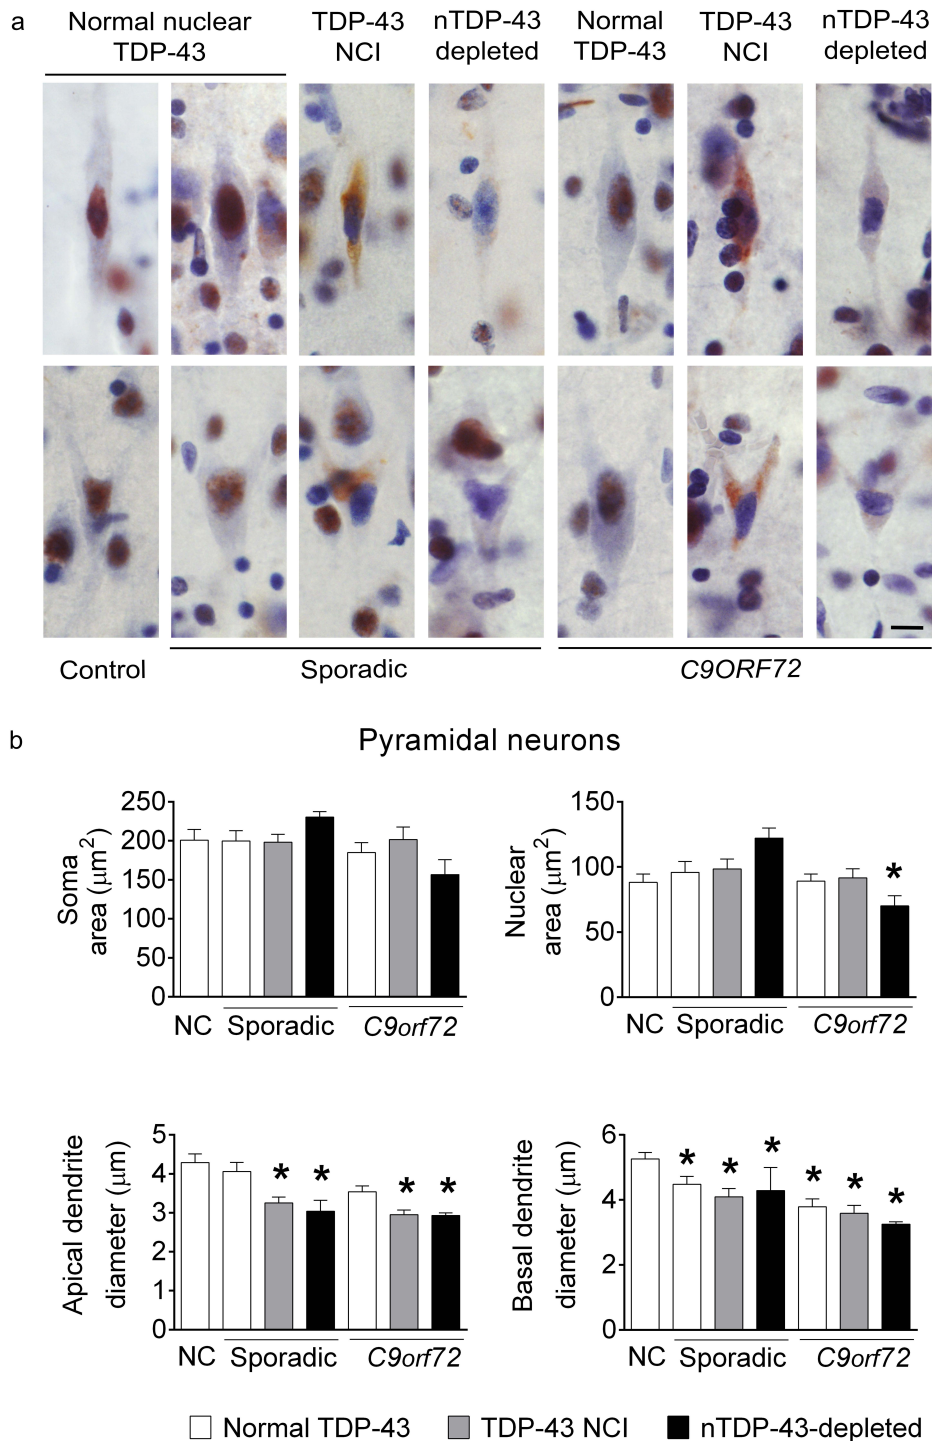

Suppl. Figure 5

**TDP-43 aggregation and nuclear TDP-43 depletion are associated with nuclear and somatodendritic atrophy in VENS and fork cells and dendritic atrophy in Layer 5 pyramidal cells.**

(a) TDP-43 neuronal cytoplasmic inclusion (NCI)-bearing and nuclear TDP-43-depleted VENS (a, upper panel) and fork cells (a, lower panel) appeared shrunken compared to VENS and fork cells with a normal nuclear TDP-43 staining pattern. Normal VENS and fork cells in patients were larger than the normal VENS and fork cells of control subjects. (b) Pyramidal neurons showed dendritic atrophy patterns that were similar to but less pronounced than VEN and fork cell dendritic atrophy. No significant difference in soma or nuclear area were observed between pyramidal neurons with or without nuclear TDP-43. Data in (b) are shown as mean  $\pm$  SEM. \*  $p < 0.01$  compared with normal controls.
